# Supplementary material for: Microfluidic Platform Integrated with Carbon Nanofibers-Decorated Gold Nanoporous Sensing Device for Serum PSA Quantification
Source: MDPI journal article supplement (doi:10.3390/bios13030390), 2023-03-16
Supplement: s1 [file s1]

Supporting Information

# Microfluidic Platform Integrated with Carbon Nanofibers-Decorated Gold Nanoporous Sensing Device for Serum PSA Quantification

Emiliano Felici <sup>1</sup>, Matías D. Regiart <sup>1,\*</sup>, Sirley V. Pereira <sup>1</sup>, Francisco G. Ortega <sup>2,3,4</sup>, Lúcio Angnes <sup>5</sup>, Germán A. Messina <sup>1</sup> and Martín A. Fernández-Baldo <sup>1,\*</sup>

<sup>1</sup> Facultad de Química, Bioquímica y Farmacia, Instituto de Química de San Luis, INQUISAL (UNSL—CONICET), Universidad Nacional de San Luis, Chacabuco 917, San Luis D5700BWS, Argentina

<sup>2</sup> GENYO, Centre for Genomics and Oncological Research, Pfizer/University of Granada/Andalusian Regional Government PTS, Granada, Avenida de la Ilustración, 114, 18016 Granada, Spain

<sup>3</sup> IBS Granada, Institute of Biomedical Research, Avenida de Madrid 15, 18012 Granada, Spain

<sup>4</sup> UGC Cartuja, Distrito Sanitario Granada Metropolitano, Calle Joaquina Eguaras, 2, 18013 Granada, Spain

<sup>5</sup> Laboratório de Automação e Instrumentação Analítica, Department of Fundamental Chemistry, Institute of Chemistry, University of São Paulo, Av. Professor Lineu Prestes 748, São Paulo 05508-000, Brazil

\* Correspondence: regiart@unsl.edu.ar (M.D.R.); mbaldo@unsl.edu.ar (M.A.F.-B.); Tel.: +54-266-4425385

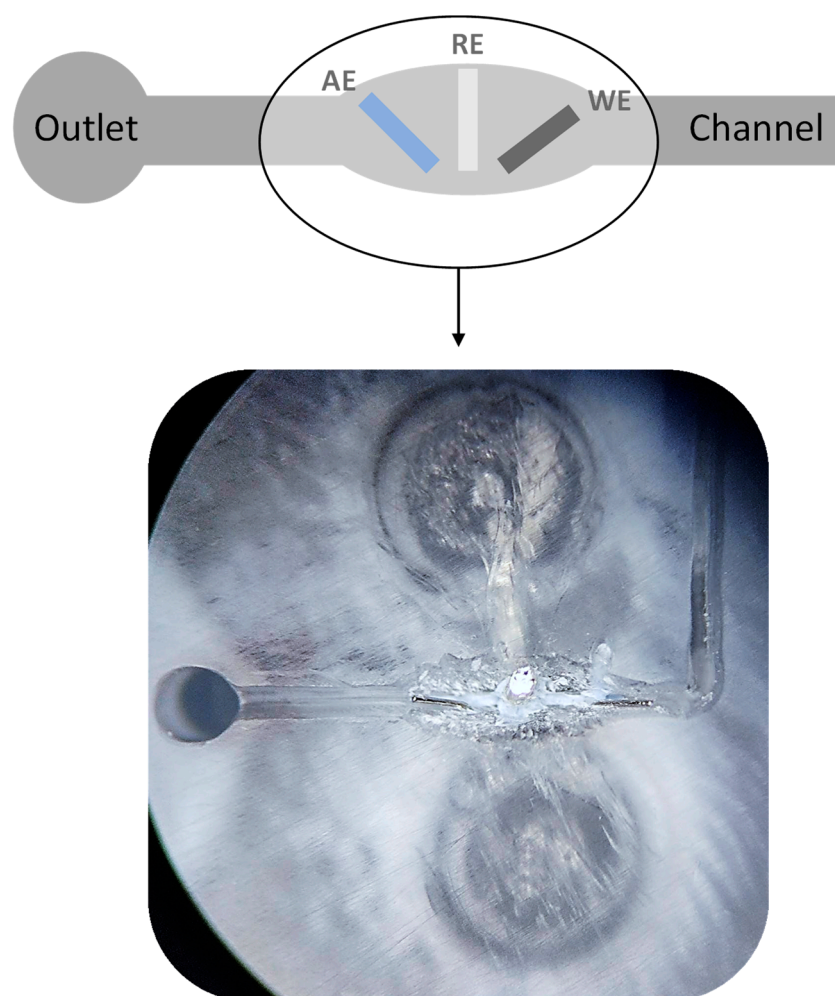

**Figure S1.** Design of the electrochemical cell and microscopy photo.

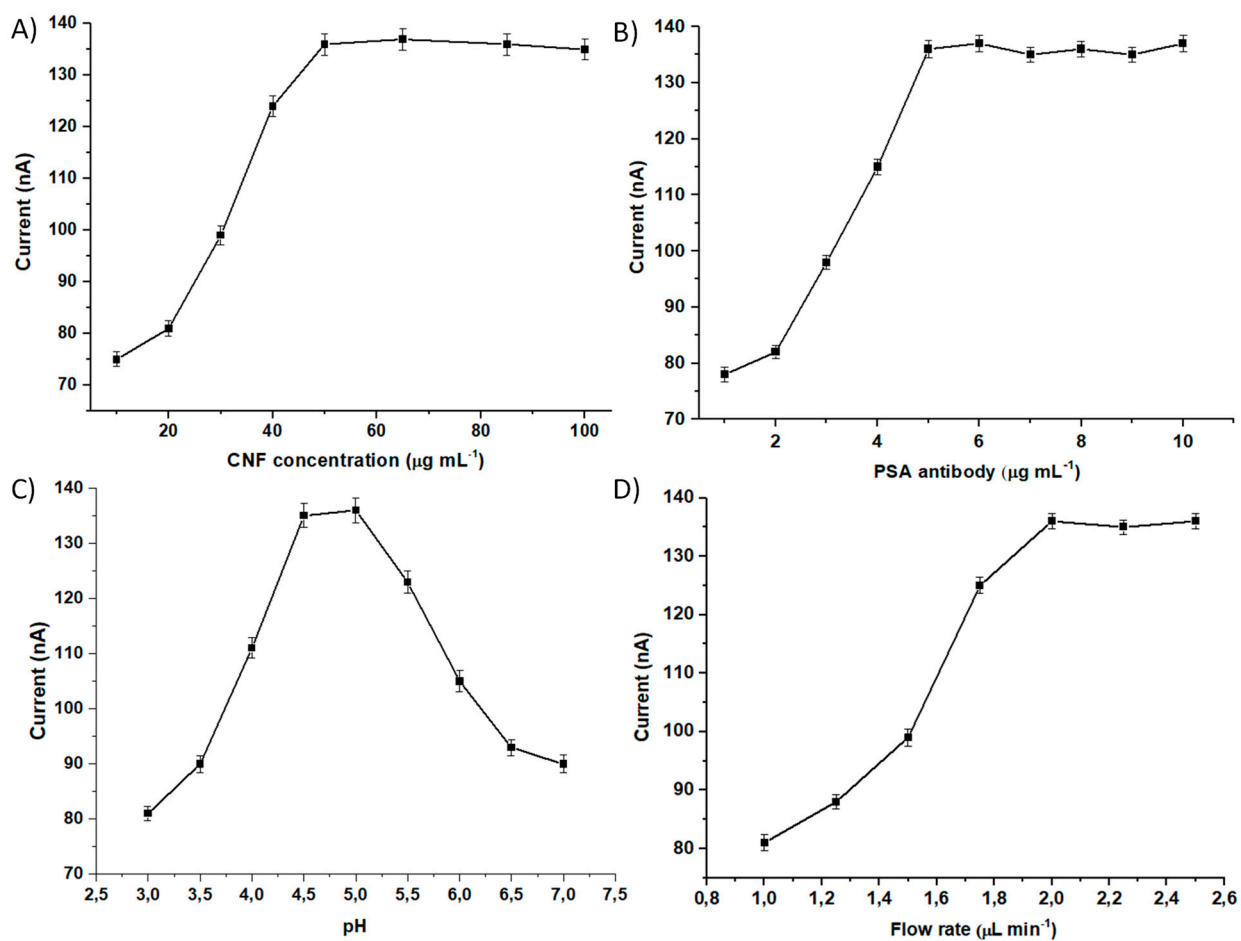

**Figure S2.** Optimization of Experimental Parameters. A) CNF concentration, B) PSA antibody concentration, C) pH, and D) Flow rate.
